# Supplementary material for: An NBD-based two-in-one Cu2+/Ni2+ chemosensor with differential charge transfer processes
Source: Royal Society of Chemistry journal article supplement (doi:10.1039/c5nj02648b), 2016-01-01
Supplement: c5nj02648b1.pdf [file c5nj02648b1.pdf]

## Supporting Information

### A NBD-based two-in-one Cu<sup>2+</sup>/Ni<sup>2+</sup> chemosensor with differential charge transfer processes

Richa Rani, Kamaldeep Paul and Vijay Luxami\*  
School of Chemistry and Biochemistry  
Thapar University, Patiala-147004  
[vluxami@thapar.edu](mailto:vluxami@thapar.edu)

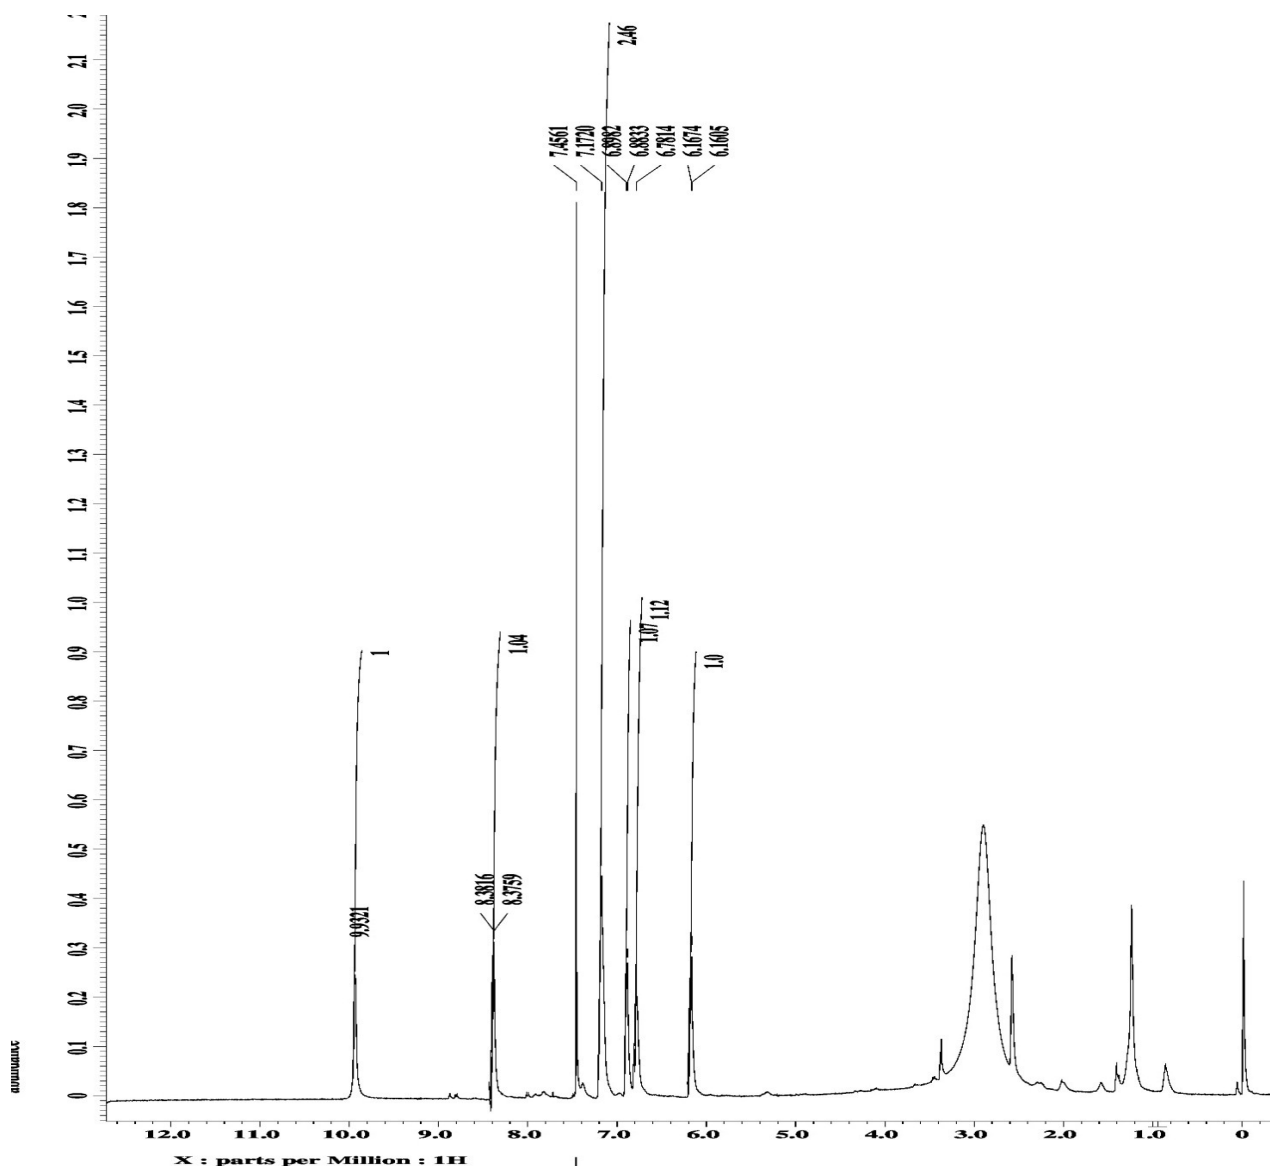

Figure SI 1: <sup>1</sup>H NMR spectrum of 2

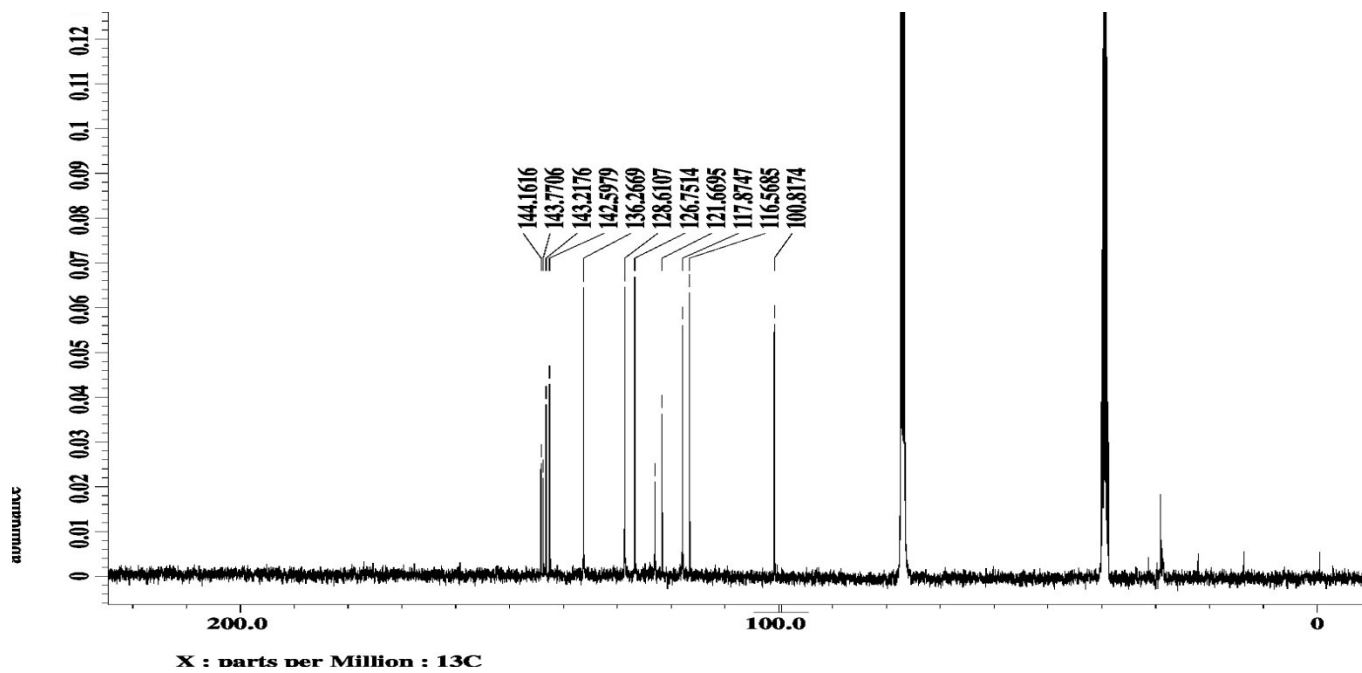

Figure SI 2:  $^{13}\text{C}$  NMR spectrum of 2

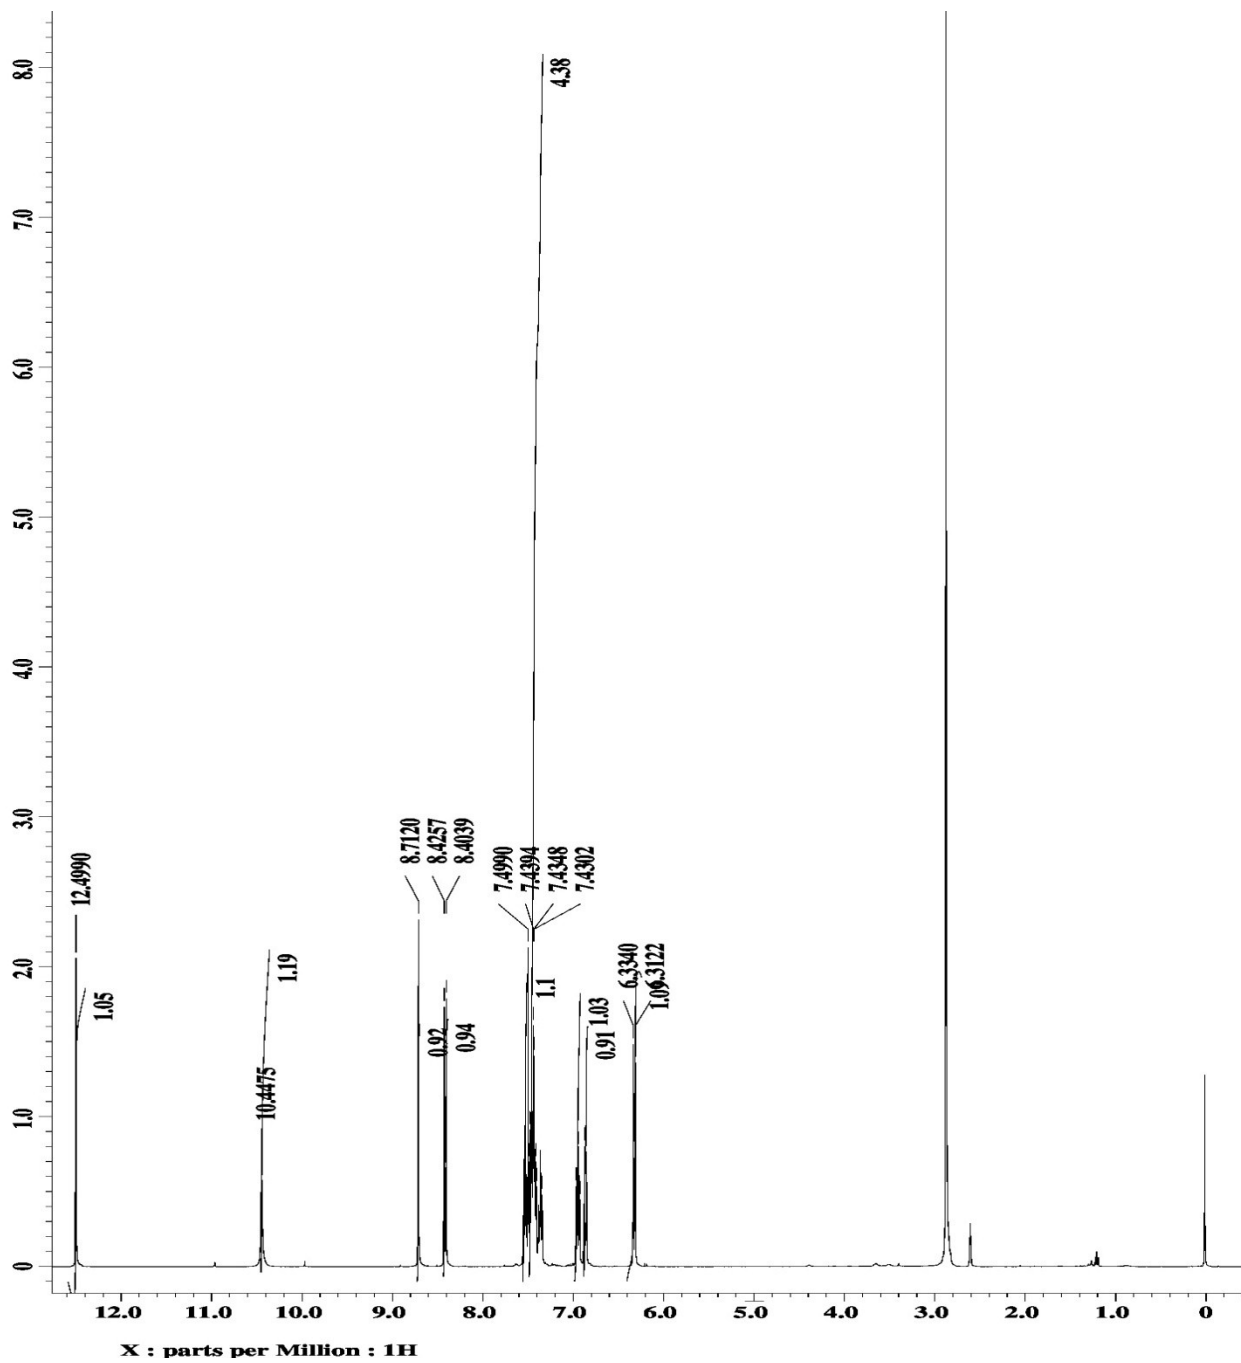

Figure SI 3: <sup>1</sup>H NMR spectrum of probe 1

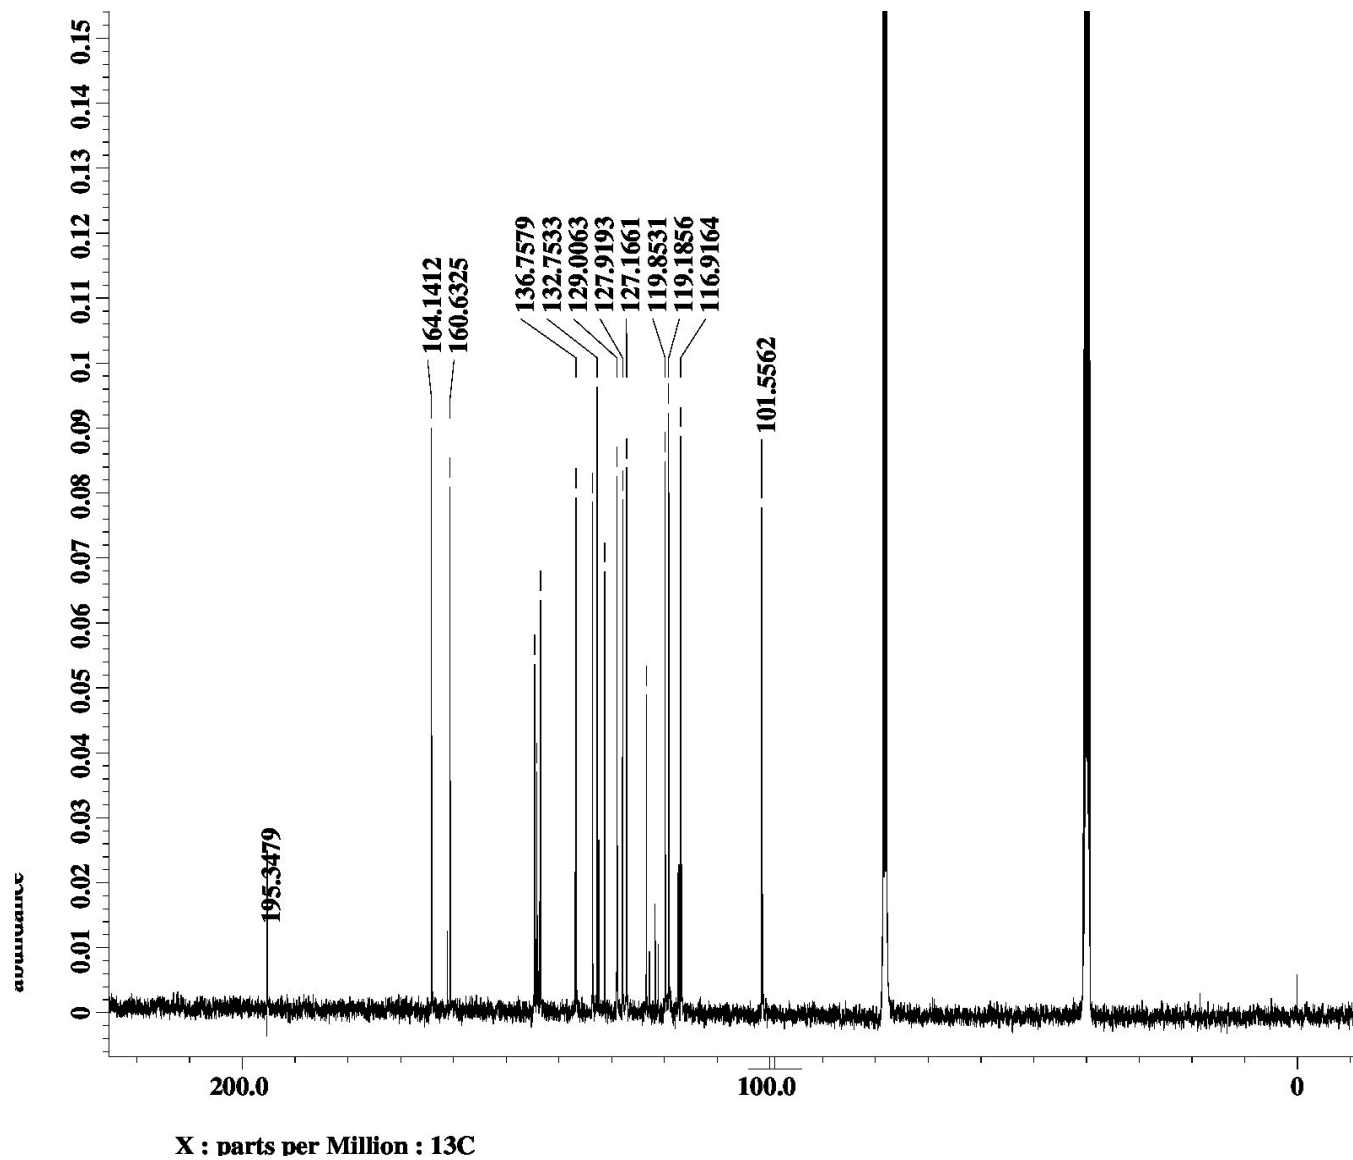

Figure S4: <sup>13</sup>C NMR spectrum of probe 1

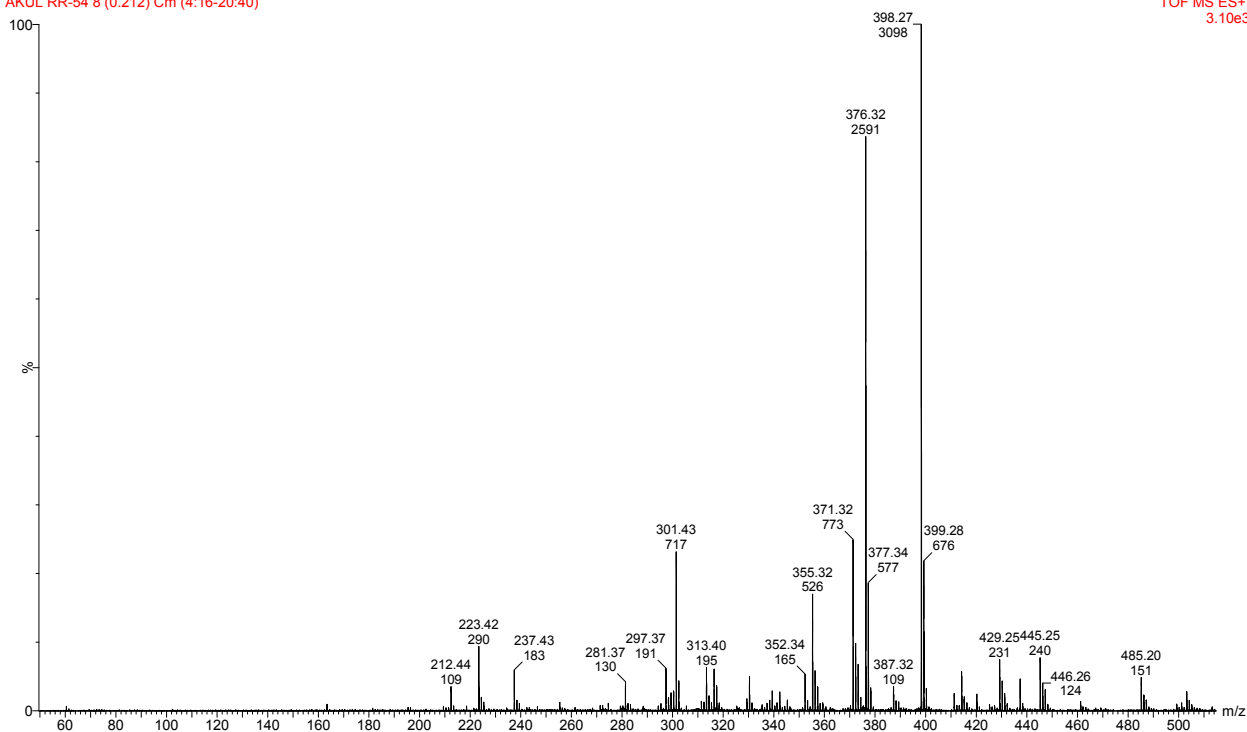

Figure S5: Mass spectrum of probe 1.

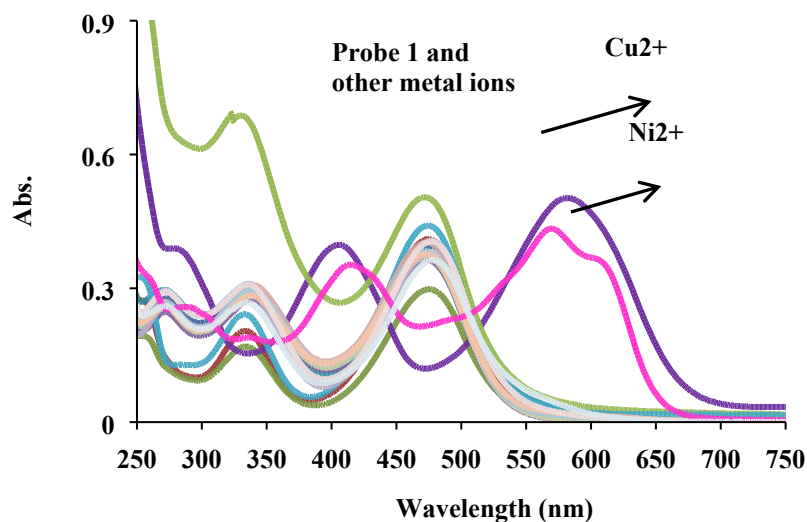

Figure S6: The UV-Visible spectra of probe 1 (20  $\mu$ M, CH<sub>3</sub>OH: H<sub>2</sub>O:: 1:1) in the presence of various metal ions (50 equiv.).

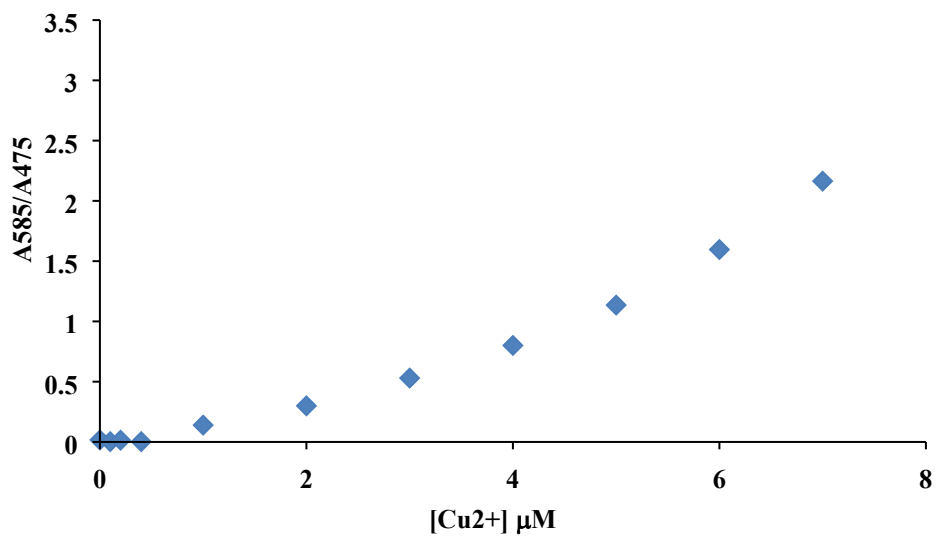

**Figure S7:** Ratiometric plot for the analysis of Cu<sup>2+</sup> ions.

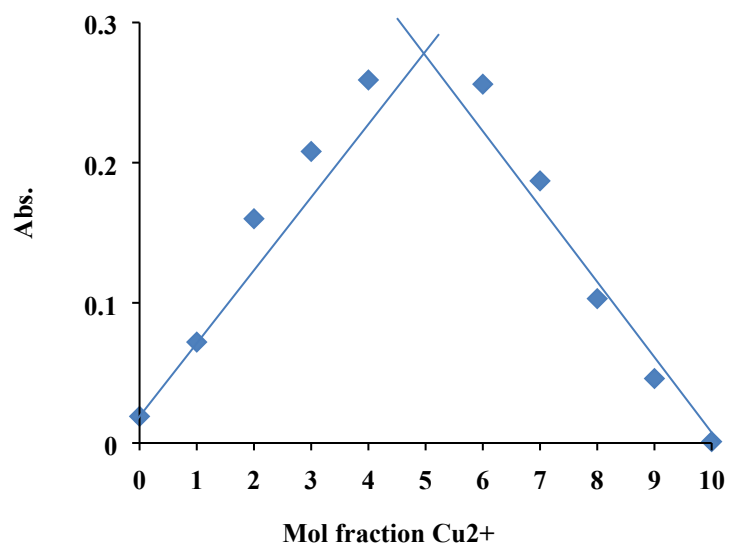

**Figure S8:** Job's plot showing the 1: 1 stoichiometry between probe 1 and Cu<sup>2+</sup>.

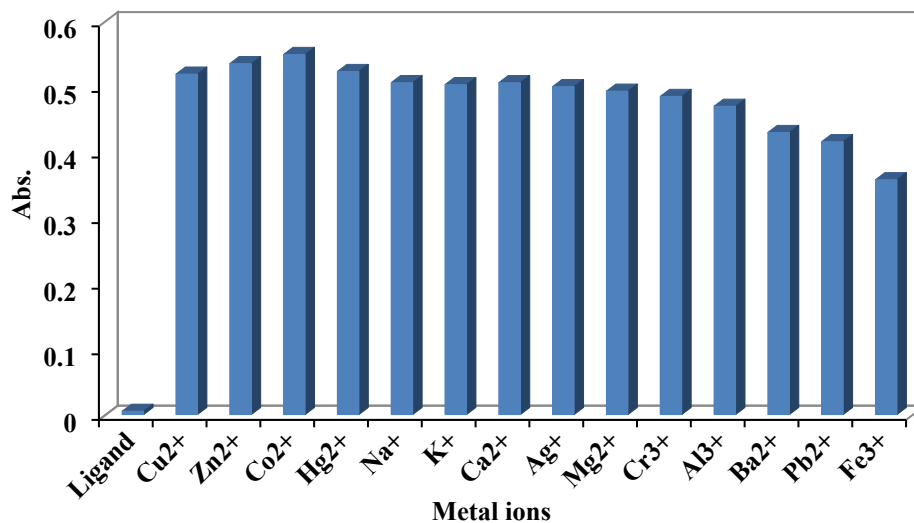

**Figure S9:** The absorption response of probe **1**. Cu<sup>2+</sup> (20 μM, CH<sub>3</sub>OH: H<sub>2</sub>O:: 1:1) at 585 nm in the presence of various interfering metal ions (1 mM).

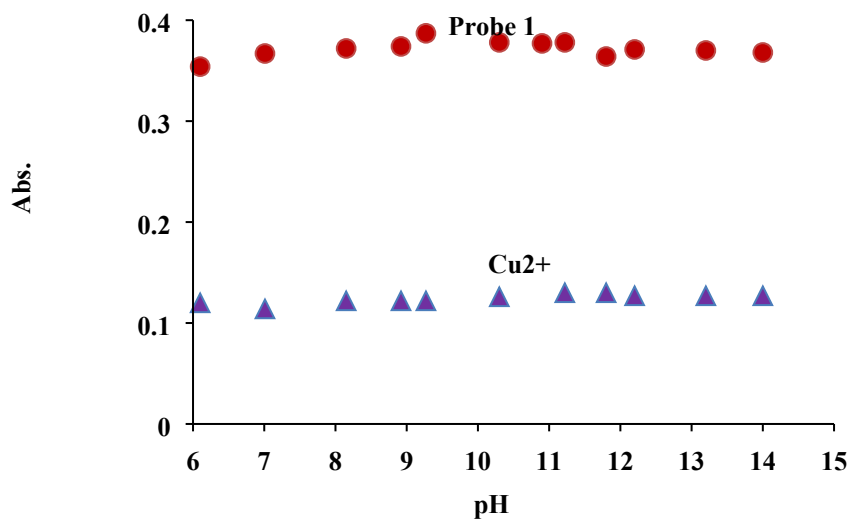

**Figure S10:** The effect of pH on absorption of probe **1** (475 nm) and probe **1**. Cu<sup>2+</sup> (20 μM, CH<sub>3</sub>OH: H<sub>2</sub>O:: 1:1, 585 nm) .

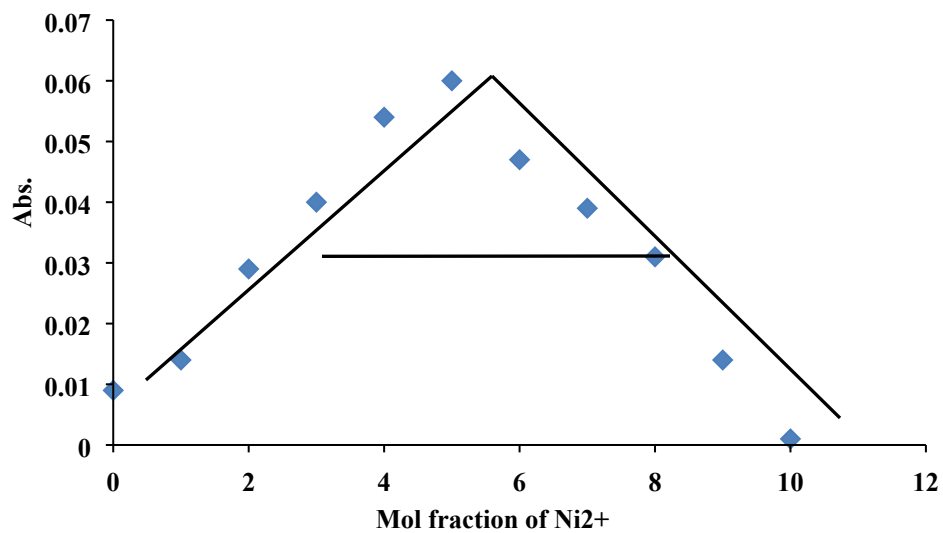

**Figure S11:** Job's plot showing the 1: 1 stoichiometry between probe **1** and Ni<sup>2+</sup> at 575 nm.

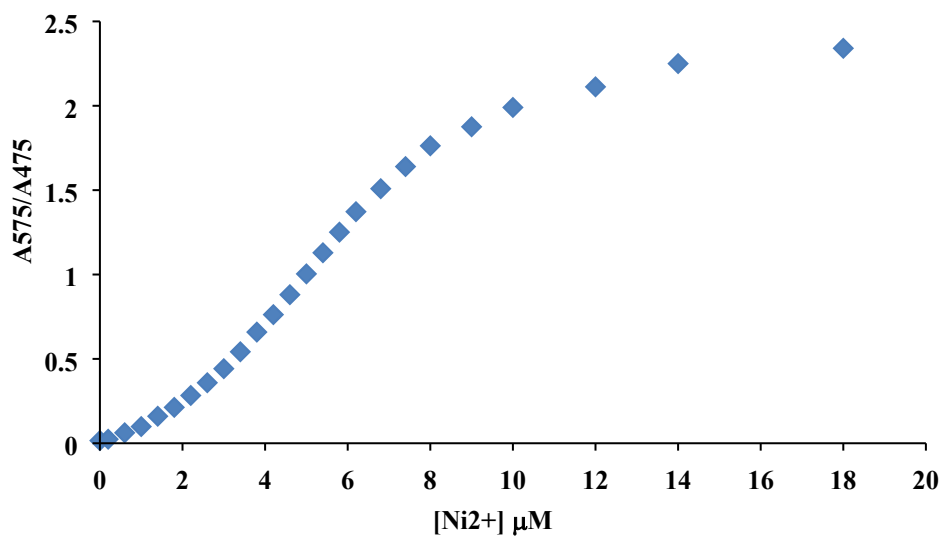

**Figure S12:** Ratiometric plot for the analysis of Ni<sup>2+</sup> ions.



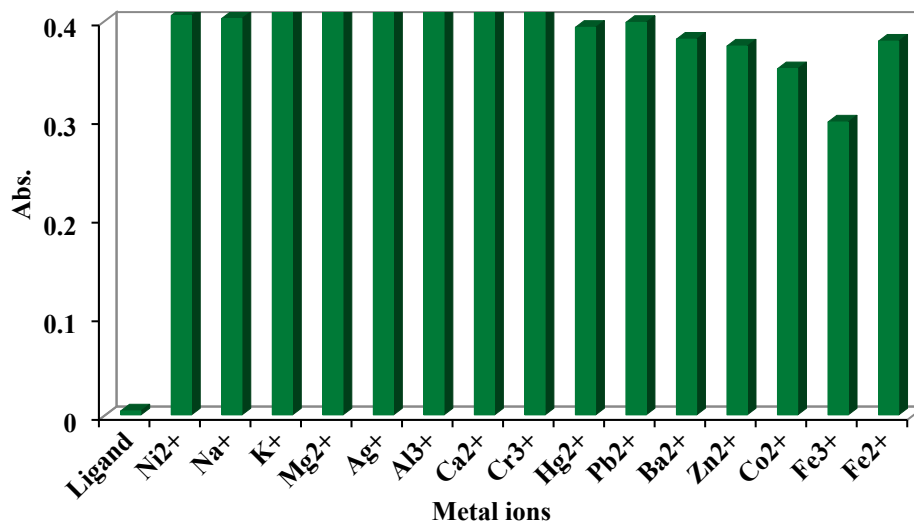

**Figure S13:** The absorption response of probe **1**. Ni<sup>2+</sup> (20 μM, CH<sub>3</sub>OH: H<sub>2</sub>O:: 1:1) in the presence of various interfering metal ions (1mM) at 575 nm.

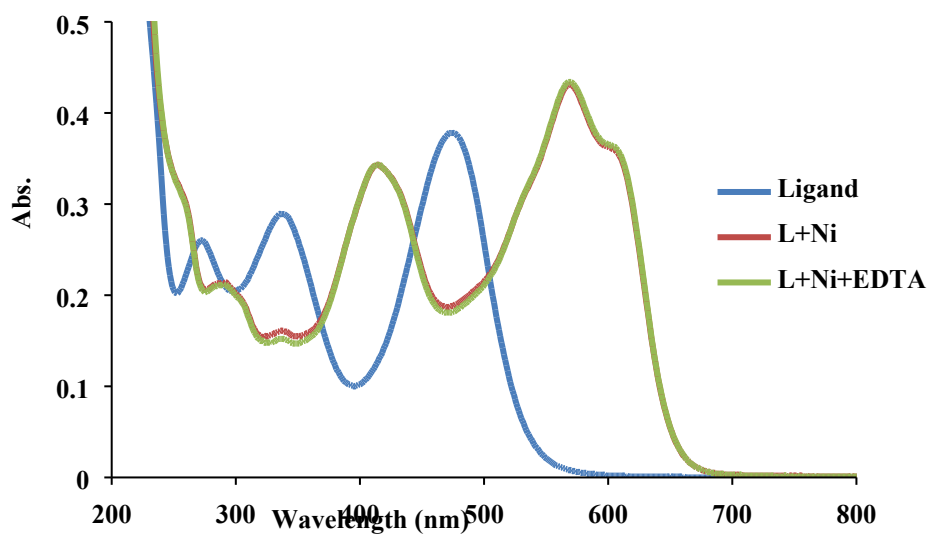

**Figure S14:** Effect of addition of EDTA on absorption spectra of probe **1**.Ni<sup>2+</sup> complex.

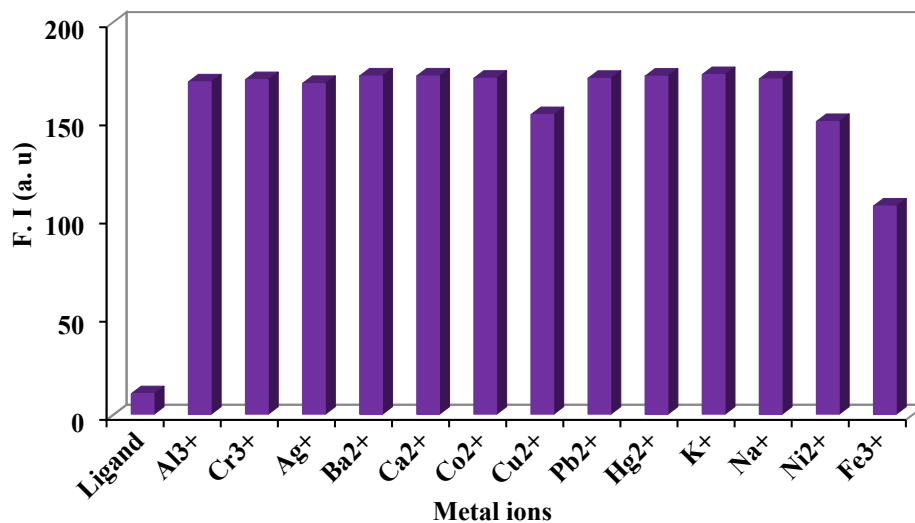

**Figure S15:** The absorption response of probe **1**. Al<sup>3+</sup> (10 μM, CH<sub>3</sub>OH: H<sub>2</sub>O:: 1:1) in the presence of various interfering metal ions (1mM).

**Table S1:** Comparison of bond distances of probe **1** with Cu<sup>2+</sup> and Ni<sup>2+</sup>

| Bond Distance (Å) | M = Cu <sup>2+</sup> | M = Ni <sup>2+</sup> |
|-------------------|----------------------|----------------------|
| Salicyl H-O...M   | 1.9587               | 1.8793               |
| NBD =N...M        | 1.9908               | 1.8920               |
| H-N...M           | 2.0672               | 1.9692               |
| Schiff =N...M     | 1.9057               | 1.8457               |

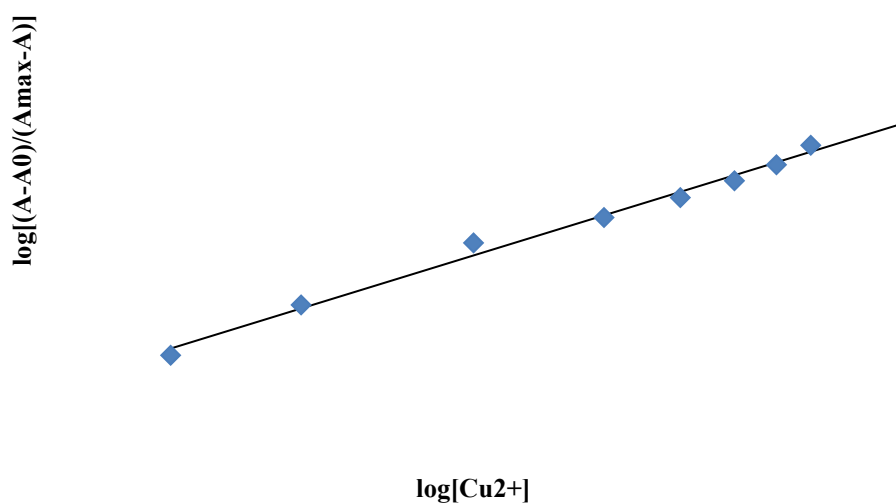

**Figure S16:** Spectral linear curve fit data for incremental addition of  $\text{Cu}^{2+}$  to probe **1** ( $20 \mu\text{M}$ ,  $\text{CH}_3\text{OH}:\text{H}_2\text{O}::1:1$ , HEPES buffer,  $\text{pH} = 7.0$ ).

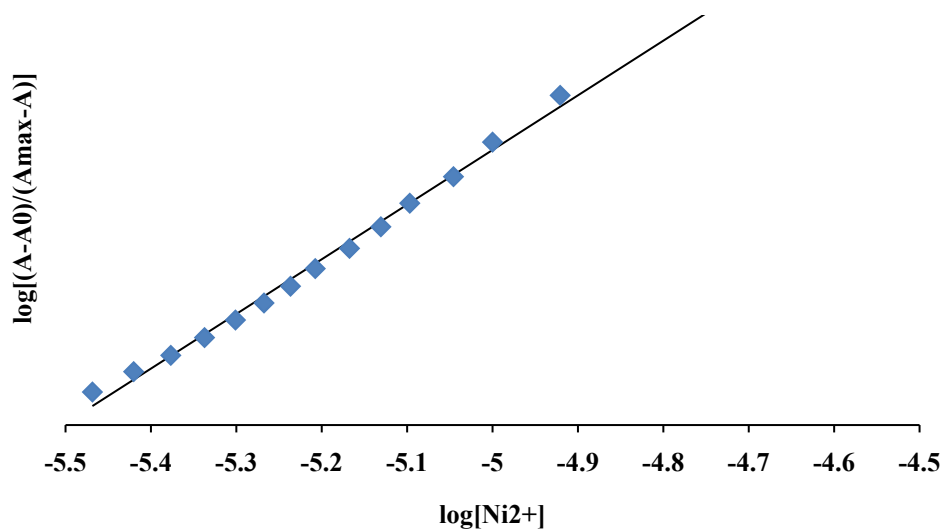

**Figure S17:** Spectral linear curve fit data for incremental addition of  $\text{Ni}^{2+}$  to probe **1** ( $20 \mu\text{M}$ ,  $\text{CH}_3\text{OH}:\text{H}_2\text{O}::1:1$ , HEPES buffer,  $\text{pH} = 7.0$ ).

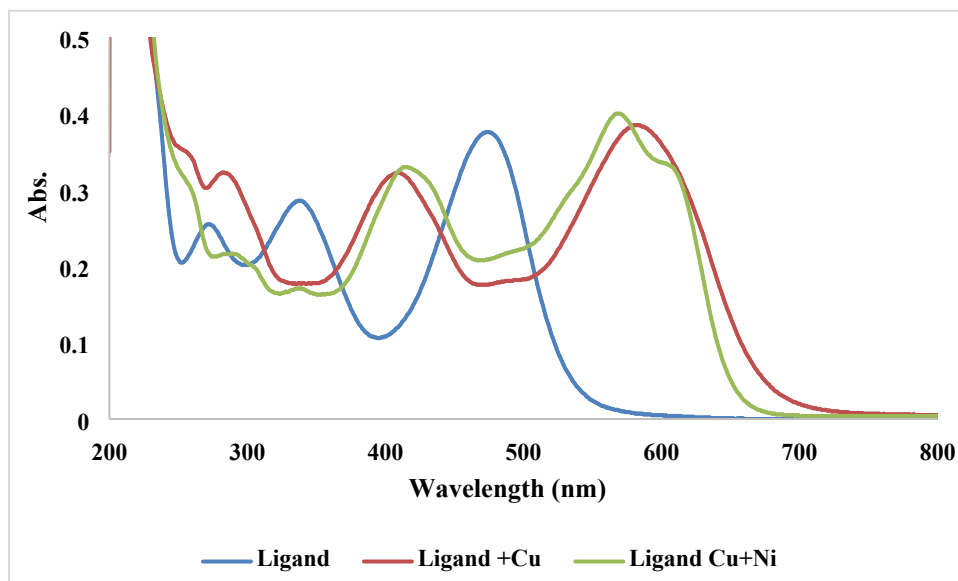

**Figure S18:** Effect of addition  $\text{Ni}^{2+}$  on absorption spectrum (1:1) probe **1**. $\text{Cu}^{2+}$  ( $20 \mu\text{M}$ ,  $\text{CH}_3\text{OH}:\text{H}_2\text{O}::1:1$ , HEPES buffer,  $\text{pH} = 7.0$ ).

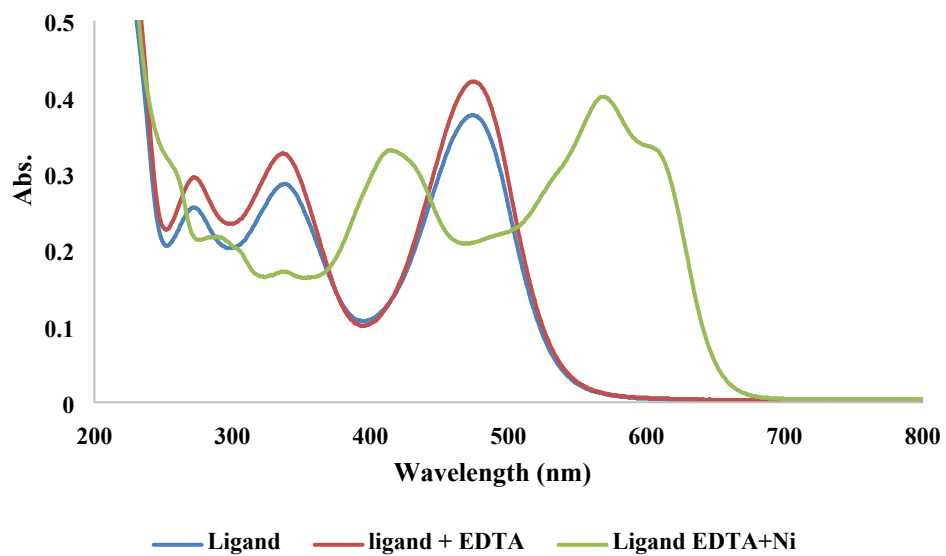

**Figure S19:** Effect of addition  $\text{Ni}^{2+}$  on absorption spectrum probe 1 having EDTA (1 equiv.) (20  $\mu\text{M}$ ,  $\text{CH}_3\text{OH}:\text{H}_2\text{O}::1:1$ , HEPES buffer,  $\text{pH} = 7.0$ ).
